# Supplementary material
Source: PubMed Central journal article supplement (PMC8805697)

## Scope2Screen: Focus+Context Techniques for Pathology TumorAssessment in Multivariate Image Data

Expert Survey (Questionnaire Results after Hands-On Usage of Tool)

|                                                                                                                                                                     | Strongly disagree | Disagree | Neutral | Agree | Strongly agree |
|---------------------------------------------------------------------------------------------------------------------------------------------------------------------|-------------------|----------|---------|-------|----------------|
| 1. The application interface design is intuitive and accessible.                                                                                                    |                   |          | 1       | 1     | 1              |
| 2. Global channel (marker) selection and configuration are manageable.                                                                                              |                   |          | 1       | 2     |                |
| 3. The focus+context approach (i.e. localized interaction via the lens) improved exploration over an overview + detail approach (i.e. the viewer without the lens). |                   |          |         |       | 3              |
| 4. The lens tool within the viewer is distracting.                                                                                                                  |                   | 2        | 1       |       |                |
| 5. Lens magnification is helpful for observing local ROIs.                                                                                                          |                   |          |         |       | 3              |
| 6. The channel filters (isolating single channel, multiple channels in lens) are helpful for comparing local and global results.                                    |                   |          |         | 2     | 1              |
| 7. The pre-set channel combination lens is helpful for understanding cell populations.                                                                              |                   |          |         | 2     | 1              |
| 8. The split-screen lens is helpful to relate H&E data to CyCIF data and to validate the alignment.                                                                 |                   |          |         |       | 3              |
| 9. The single-cell lens features (histograms, radial plot) are helpful to relate to spatially referenced single-cell expressions                                    |                   |          |         | 1     | 2              |
| 10. The cell type lens is helpful for identifying and validate cell type results from classification.                                                               |                   |          |         | 1     | 2              |
| 11. The similarity search returns 'similar areas' aligning with the visual impression of similarity.                                                                |                   |          | 1       | 2     |                |
| 12. The segmentation outline filter is helpful for image comparison.                                                                                                |                   |          | 1       | 1     | 1              |
| 13. The snapshot fuctionality and dotter panel (right) is useful for saving and annotating ROIs.                                                                    |                   |          |         | 2     | 1              |
| 14. The tool is easy to learn and use.                                                                                                                              |                   |          |         | 2     | 1              |

\*numbers refer to the nu,ber of experts giving this answer

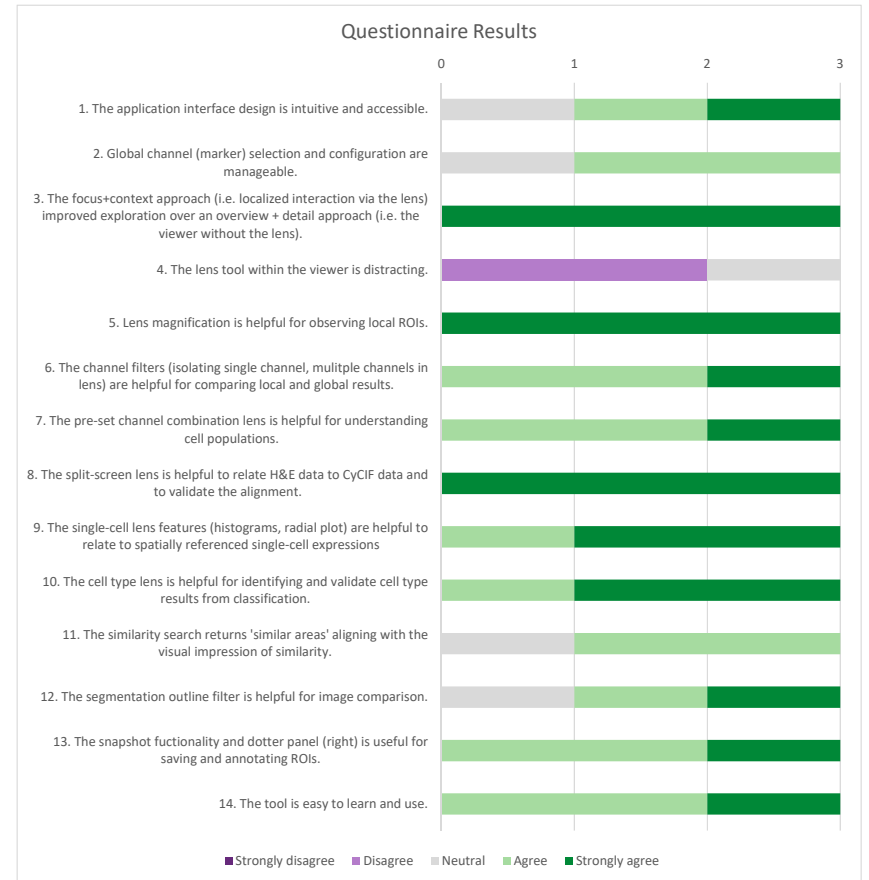

Supplement: NIHMS1771605-supplement-survey.pdf [file NIHMS1771605-supplement-survey.pdf]
